# Supplementary material
Source: PubMed Central journal article supplement (PMC7641138)
Supplement: 41396_2020_685_MOESM1_ESM.pdf [file 41396_2020_685_MOESM1_ESM.pdf]

## Supplementary Figure and Dataset legends

### Fig S1. Pellicle biofilm formation and total productivity assessment.

**a)** Pellicle biofilms formed by mono-cultures of WT,  $\Delta eps$ , and co-culture of WT+  $\Delta eps$  in 2xSG medium incubated for 48 hours at 30°C recorded using Samsung Galaxy S6 Phone Camera. Scale bar, 1cm. **b)** Productivity assessment based on CFU/ml were performed on pellicle biofilms of WT,  $\Delta eps$ , WT+  $\Delta eps$  co-culture and control co-culture of two WT strains (WT<sup>mKate</sup> used in the evolution experiment, and non-labelled WT). Productivity of  $\Delta eps$  dramatically increased ( $p < 3 \times 10^{-5}$ , Pair-Sample t-Test) when co-cultured with WT, while productivity of WT decreased ( $p < 0.002$ , Pair-Sample t-Test) in the presence of  $\Delta eps$ , indicating the ability of the mutants to act as cheaters (n=5, error bar based on standard error).

**Fig S2. Qualitative assessment of *eps* gene expression based on confocal laser scanning microscopy.** Pellicles formed by randomly selected WT strains 168 mKATE P<sub>*eps*</sub>-GFP evolved in the presence of cheaters (Pop1-Pop8) and in the absence of cheaters (C1-C4) were visualized using confocal laser scanning microscope. Cells constitutively expressing mKATE are represented in magenta (OFF cells) and *eps*- expressing cells (ON cells) are represented in green. Scale bar 10 $\mu$ m.

**Fig S3. Single cell level distribution of *eps* expression in 10 randomly selected single isolates from WT<sub>anc</sub> and evolved WT populations.** Flow cytometry data (BD Facscanto II, BD biosciences) showing single cell level distributions of fluorescence intensity of 24-hour old pellicles established by 10 randomly selected single isolates from populations of WT evolved in the absence (C1-C4) or presence of cheaters (Pop1-Pop8) as well as autofluorescence distribution in non-labelled WT control.

**Fig S4. Complementation assay of  $\Delta eps$  with supernatant from  $\Delta rsiX$  or WT.** Productivity data of pellicles produced by the complementation showed that hyper ON  $\Delta rsiX$  mutant does not contribute to improved performance of  $\Delta eps$ . Mean is represented in square inside the box plots; median is denoted by horizontal line within the boxes; whiskers represent the min and max (n=3 for  $\Delta eps$ ; n=6 for  $\Delta eps$ +SMs). \*\*\*p<0.001 compared to  $\Delta eps$ ;  $\Delta eps$ + WT SM is not significantly different from  $\Delta eps$ +  $\Delta rsiX$  SM (p=0.58) (ANOVA, Tukey Test).

**Fig S5. Performance of  $\Delta rsiX$  and evolved and co-evolved WT in mixed pellicles with  $\Delta eps_{anc}$ .** Pellicle competition assay of single clones belonging to producer populations (WT<sub>anc</sub> (n=9),  $\Delta rsiX$  (n=8), WT evolved with (n=4) and without cheaters (n=4)) against  $\Delta eps_{anc}$ . Mean is represented in square inside the box plots; median is denoted by horizontal line within the boxes; whiskers represent the min and max; single dots represent the individual data points (n). \*\*\*p<0.001 compared to the WT<sub>anc</sub> (One-way Repeated Measures ANOVA, Dunnett Test).

**Fig S6. Fitness effects of  $rsiX$  deletion.** Selection rate based on fitness assay in pairwise competition of  $\Delta rsiX$  and WT ancestor showing no significant fitness cost brought about by  $rsiX$  mutation. Relative fitness of  $\Delta rsiX$  is  $1.00 \pm 0.024$  SD. Mean is represented in square within the boxplots; median is denoted by horizontal line inside the boxes; whiskers represent the min and max.

**Fig S7. Pellicle productivity of monocultures.** Total CFU/ml of pellicles produced by monocultures of WT<sub>anc</sub> (n=7),  $\Delta rsiX$  (n=3) and evolved with cheaters (n=8) from population 3 (5<sup>th</sup>, 10<sup>th</sup>) and 7 (30<sup>th</sup>) and single clones of WT evolved without cheaters (Pop 3a; n=4). Mean is

represented in square; median is denoted by horizontal line inside the box; whiskers represent the min and max; single dots represent the individual datapoints (n). All p values >0.05 (ANOVA, Tukey Test).

**Fig S8. Effect of *rsiX* mutation on positioning in the pellicle.** Competition assay between fluorescently WT+ $\Delta eps$  and  $\Delta rsiX$ + $\Delta eps$ . Strains labelled with constitutively expressed GFP and mKate proteins, were inoculated in 1:1 initial frequencies, pellicles were cultivated for 48h at 30°C and visualized using stereomicroscope. Upper panels represent controls (two isogenic WT or  $\Delta rsiX$  strains labelled with different fluorescent markers), middle panel represents pellicles formed by WT+ $\Delta eps$  and bottom panels represent pellicles formed by  $\Delta rsiX$ + $\Delta eps$ , each in two alternative combinations of fluorescent markers. Well size = 1.5cm.

**Figure S9. Productivity changes during short and long-term co-evolution of WT+ $\Delta eps$ . Pellicle** Total colony forming unit per ml of WT and  $\Delta eps$  in 48-hour old pellicles a non-evolved (start) (n=9), after experimental evolution at 5<sup>th</sup> (n=8 populations) and 10<sup>th</sup> transfer (n=7 populations) One population after 10<sup>th</sup> transfer was incapable to form pellicle attributed to WT being outnumbered by  $\Delta eps$ . **b** Line graph showing the fate of populations. Data was obtained from CFU assay using selective antibiotic marker, Kanamycin selecting for WT and Tetracycline for selecting  $\Delta eps$ .

**Supplementary dataset 1.** Statistical comparisons of *eps* expression and single cell level distribution within ancestral and evolved populations.

**Supplementary dataset 2.** List of detected SNPs of evolved strains and their functional analysis.
