# Supplementary material
Source: PubMed Central journal article supplement (PMC7641138)
Supplement: 41396_2020_685_MOESM9_ESM.pdf [file 41396_2020_685_MOESM9_ESM.pdf]

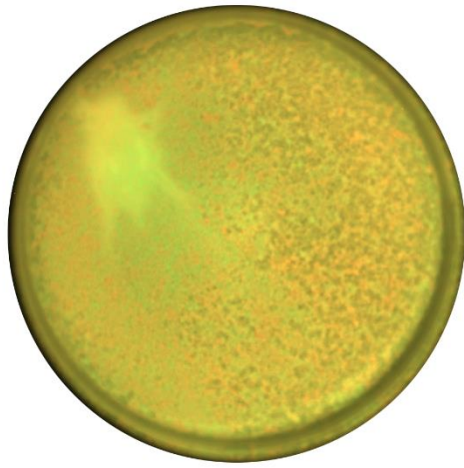

WT mKATE vs WT GFP

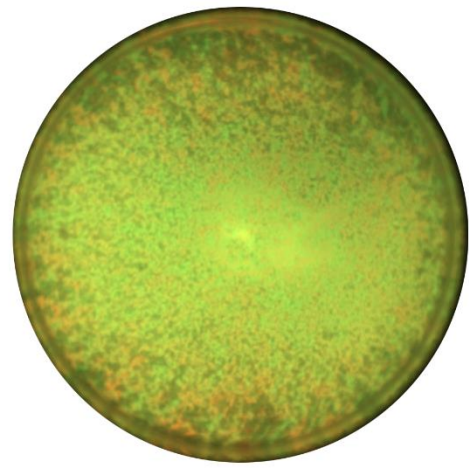

$\Delta rsiX$  mKATE vs  $\Delta rsiX$  GFP

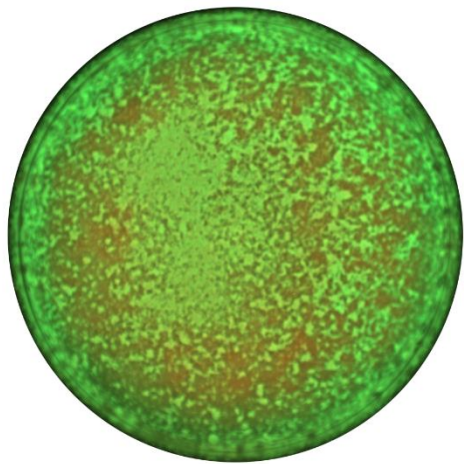

WT mKATE vs  $\Delta eps$  GFP

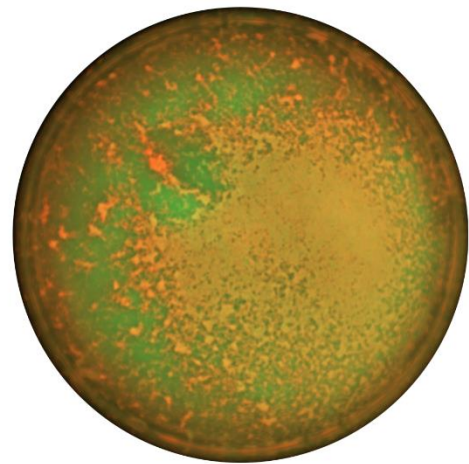

WT GFP vs  $\Delta eps$  mKATE

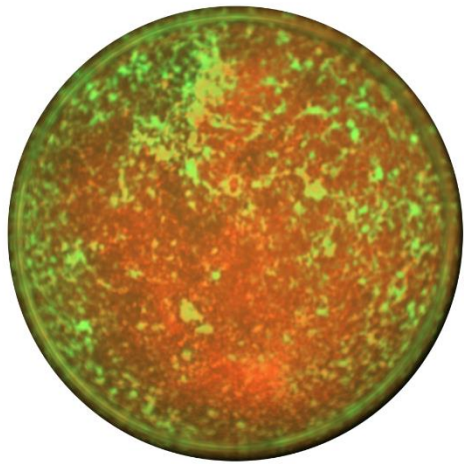

$\Delta rsiX$  mKATE vs  $\Delta eps$  GFP

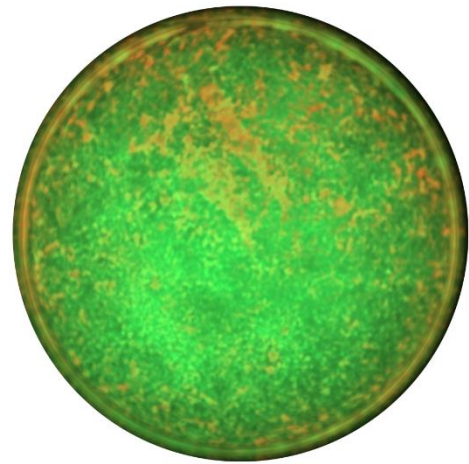

$\Delta rsiX$  GFP vs  $\Delta eps$  mKATE
