# Supplementary material
Source: PubMed Central journal article supplement (PMC7641138)

A)

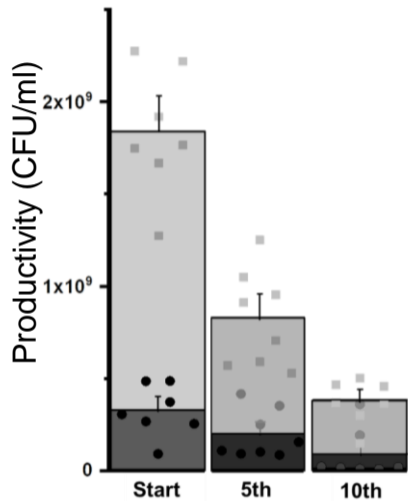

B)

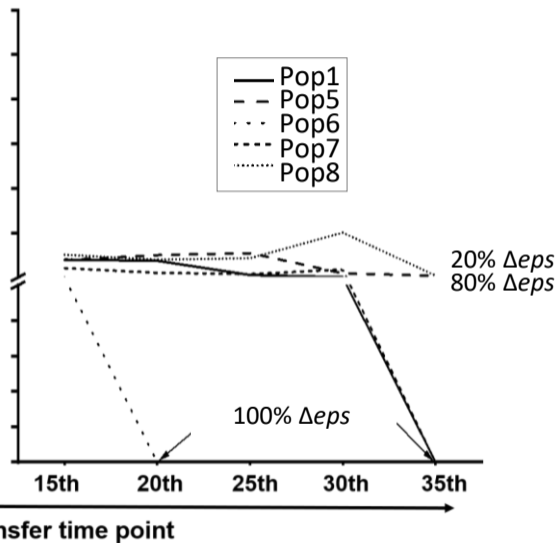

Supplement: 41396_2020_685_MOESM10_ESM.pdf [file 41396_2020_685_MOESM10_ESM.pdf]

**A)**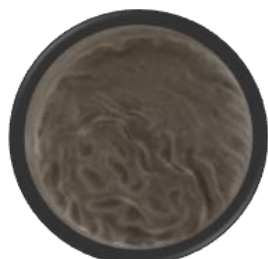

WT

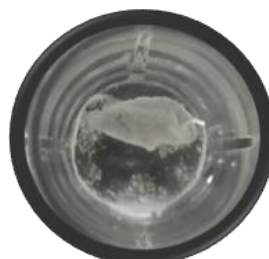 $\Delta eps$ 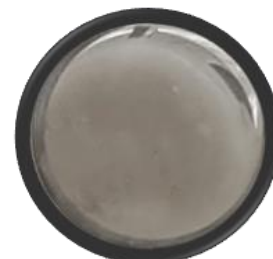WT +  $\Delta eps$ 

1 cm

**B)**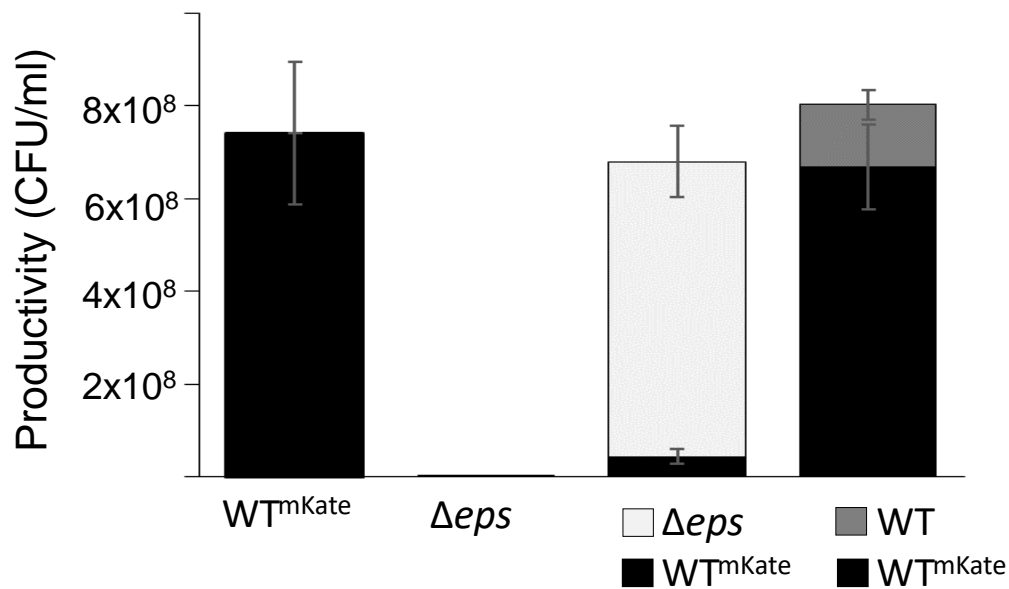

Supplement: 41396_2020_685_MOESM2_ESM.pdf [file 41396_2020_685_MOESM2_ESM.pdf]

ON OFF

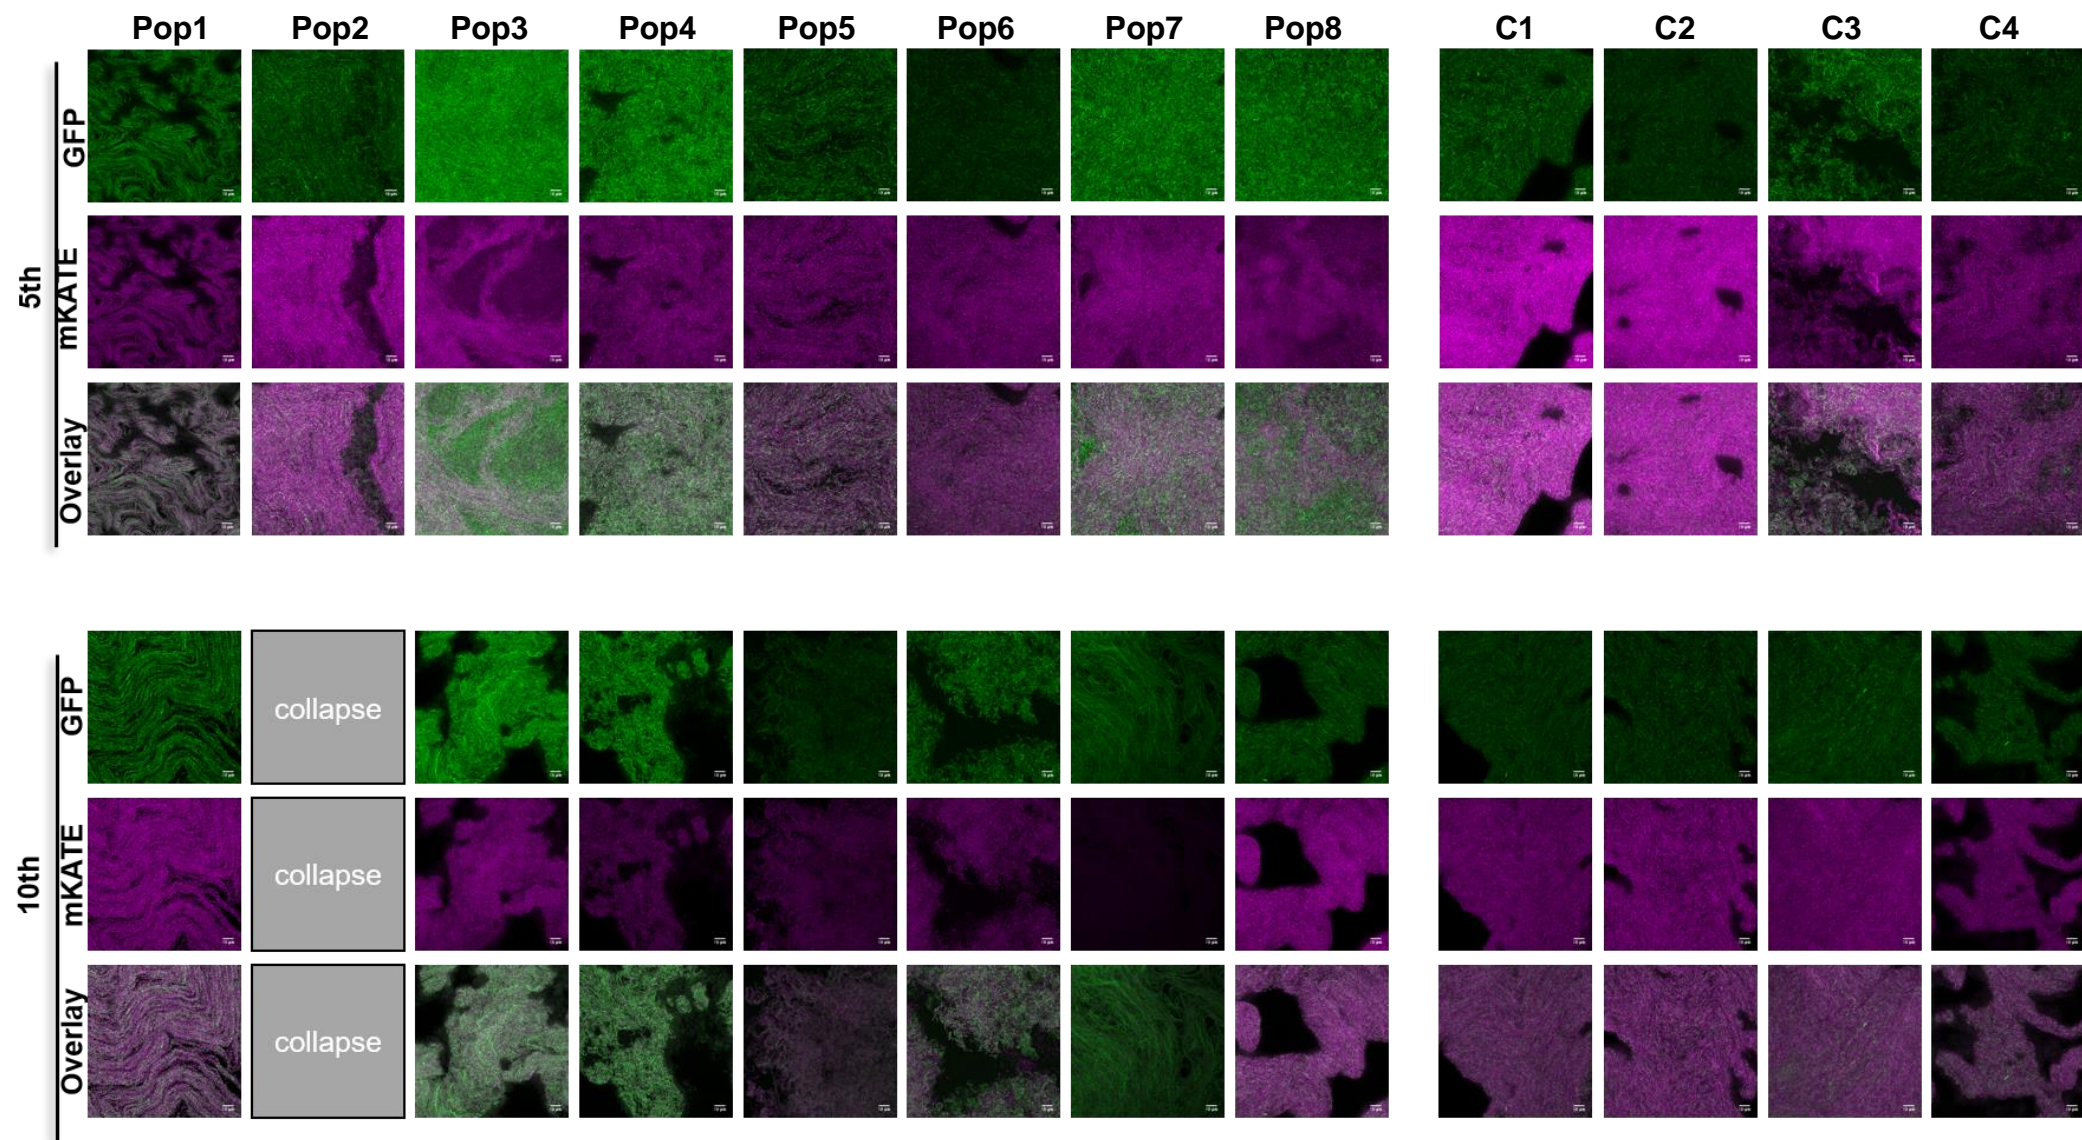

Supplement: 41396_2020_685_MOESM3_ESM.pdf [file 41396_2020_685_MOESM3_ESM.pdf]

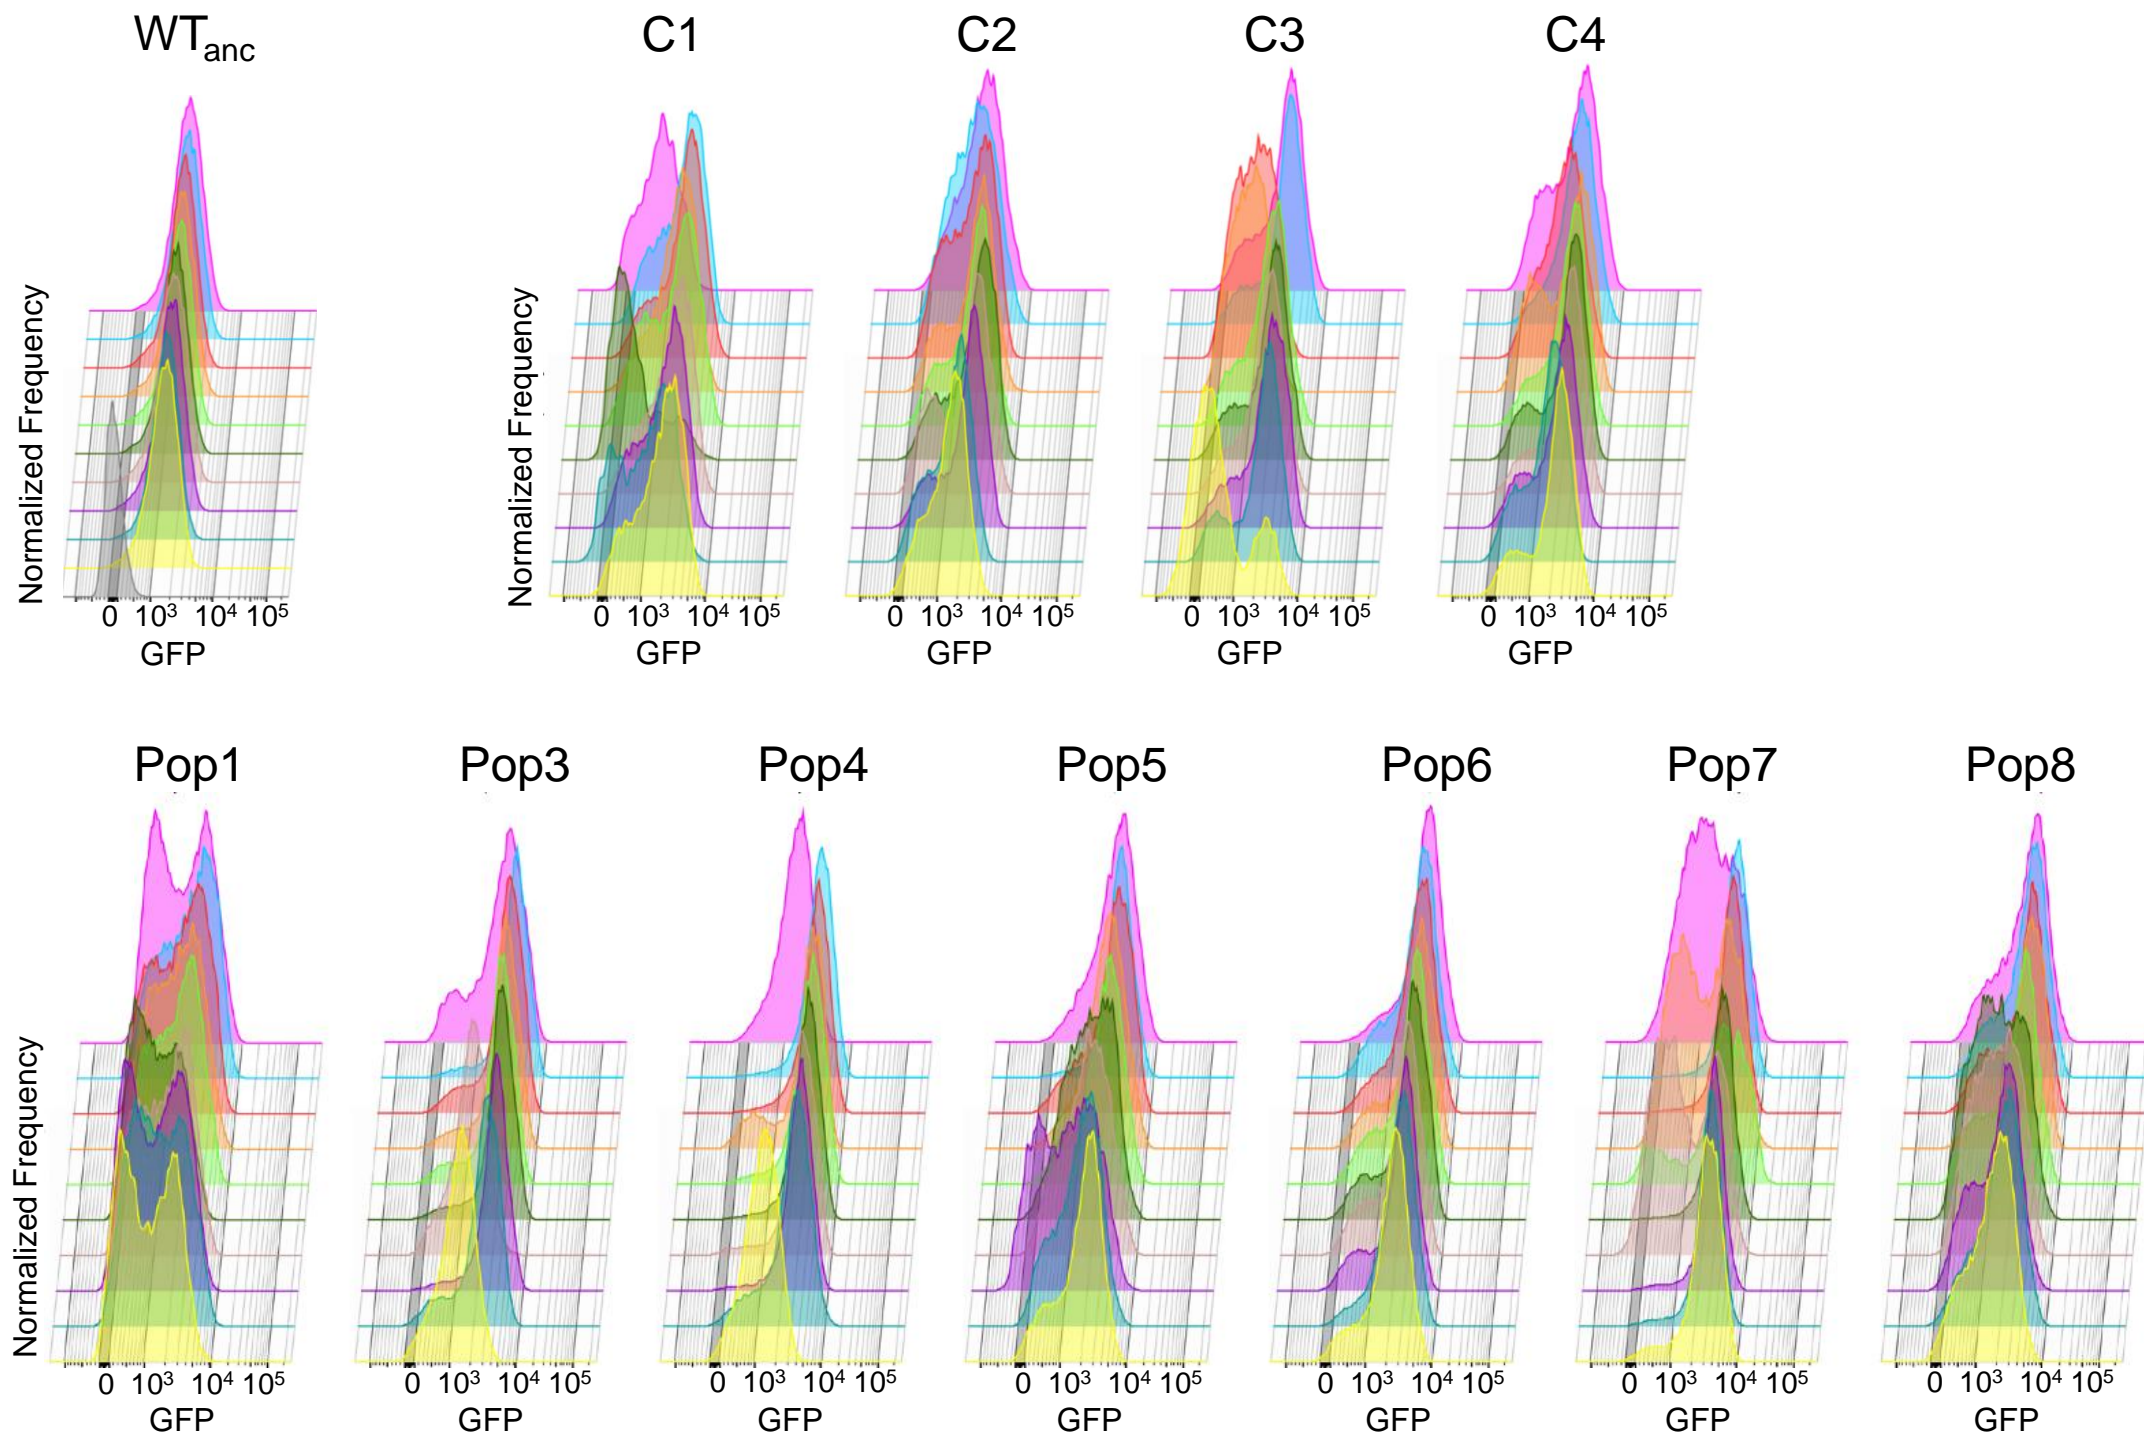

Supplement: 41396_2020_685_MOESM4_ESM.pdf [file 41396_2020_685_MOESM4_ESM.pdf]

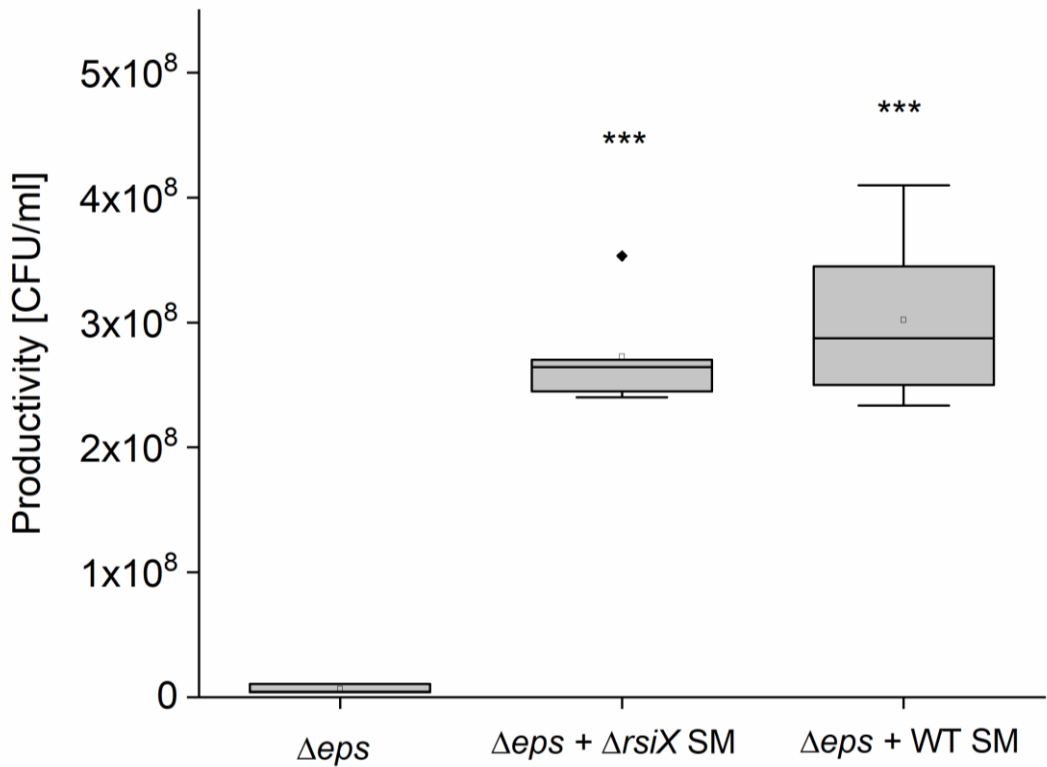

Supplement: 41396_2020_685_MOESM5_ESM.pdf [file 41396_2020_685_MOESM5_ESM.pdf]

vs  $\Delta\epsilon_{\text{anc}}$

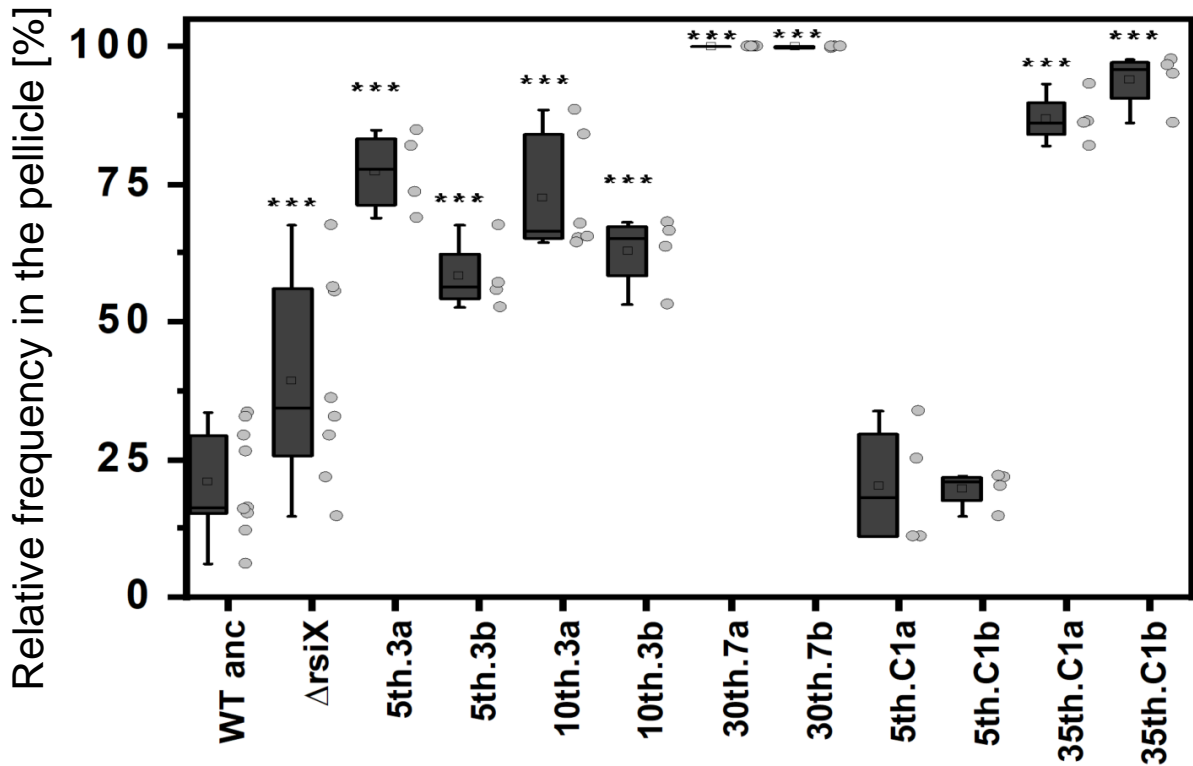

Supplement: 41396_2020_685_MOESM6_ESM.pdf [file 41396_2020_685_MOESM6_ESM.pdf]

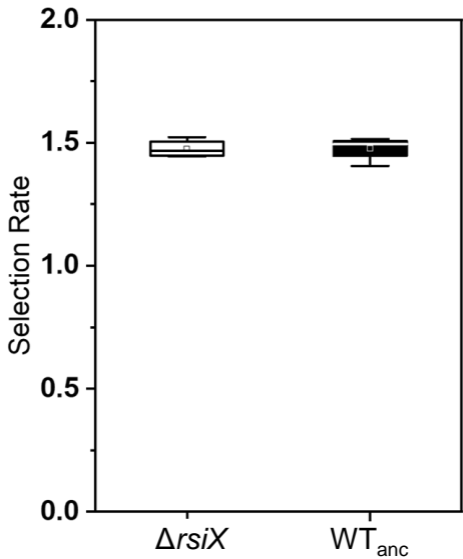

Supplement: 41396_2020_685_MOESM7_ESM.pdf [file 41396_2020_685_MOESM7_ESM.pdf]

Productivity (CFU/ml)

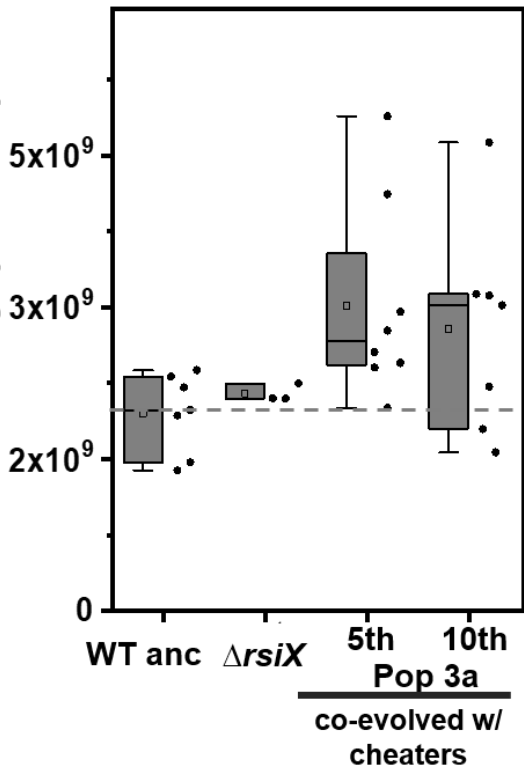

Supplement: 41396_2020_685_MOESM8_ESM.pdf [file 41396_2020_685_MOESM8_ESM.pdf]
